# Supplementary material for: Microtubule polyglutamylation and acetylation drive microtubule dynamics critical for platelet formation
Source: PubMed Central journal article supplement (PMC6194603; doi:10.1186/s12915-018-0584-6), 2018-10-18
Supplement: 12915_2018_584_MOESM9_ESM.pdf [file 12915_2018_584_MOESM9_ESM.pdf]

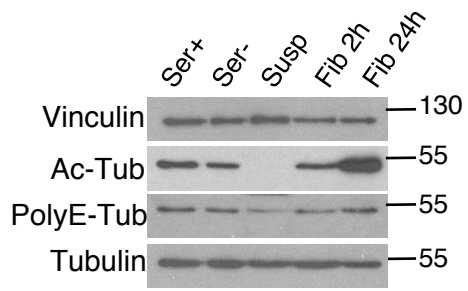

Suppl. Figure 2
